# Supplementary material
Source: ML conference proceedings conference paper supplement (https://openaccess.thecvf.com/content/ICCV_2019/html/Saini_Markerless_Outdoor_Human_ICCV_2019_paper.html)
Supplement: Supplementary file 1 [file Saini_Markerless_Outdoor_Human_ICCV_2019_supplemental.zip]

Archive with 2 entries (2 files):
- 5116_supp.pdf
- 5116_supp_vid.mp4
